# Supplementary material for: Residual risk of cardiovascular complications in statin-using patients with type 2 diabetes: the Taiwan Diabetes Registry Study
Source: Springer Nature journal article supplement (doi:10.1186/s12944-023-02001-z), 2024-01-23
Supplement: MOESM1 [file 12944_2023_2001_MOESM1_ESM.pdf]

# Residual Risk of Cardiovascular Complications in Statin-Using Patients with Type 2 Diabetes: The Taiwan Diabetes Registry Study

*By* CS KUO

## Abstract

**Background** The residual risks of atherosclerotic cardiovascular disease in statin-treated patients with diabetes remain unclear. This study was conducted to identify factors associated with these residual risks in patients with no prior vascular event.

**Methods** Data on 683 statin-using patients with type 2 diabetes mellitus (T2DM) from the Taiwan Diabetes Registry were used in this study. Patients aged <25 or >65 years at the time of diabetes diagnosis and those with diabetes durations  $\geq 20$  years were excluded. The United Kingdom Prospective Diabetes Study risk engine (version 2.01; <https://www.dtu.ox.ac.uk/riskengine/>) was used to calculate 10-year residual nonfatal and fatal coronary heart disease (CHD) and stroke risks. Associations of these risks with physical and biochemical variables, including medication use and comorbidity, were examined.

**Results** The 10-year risks of nonfatal CHD in oral anti-diabetic drug (OAD), insulin and OAD plus insulin groups were 11.8%, 16.0%, and 16.8%, respectively. The 10-year risks of nonfatal stroke in OAD, insulin and OAD plus insulin groups were 3.0%, 3.4%, and 4.3%, respectively. In the multivariate model, we determined that chronic kidney disease (CKD), neuropathy, insulin use, calcium-channel blocker (CCB) use, higher body mass indices (BMI), low-density lipoprotein (LDL), fasting glucose, log-triglyceride (TG), and log-alanine transaminase (ALT) levels were associated with an increased CHD risk. The residual risk of stroke was associated with CKD, neuropathy, CCB use, and lower LDL cholesterol levels, higher BMI and diastolic blood pressure.

**Conclusion** This study indicated that insulin was probably a residual risk factor of CHD but not stroke, and that there was a possible presence of obesity paradox in patients with T2DM on statin therapy. In addition to lowering TG and normalizing fasting glucose levels, lower LDL cholesterol level is better for reduction of risk of CHD on statin therapy. On the other hand, lower LDL cholesterol level could potentially be related to higher risk of stroke among

26 populations receiving statin therapy. Our findings suggest potential therapeutic targets for  
27 residual cardiovascular risk reduction in patients with T2DM on statin therapy.

28

29 **Keywords:** Diabetes, Residual risk, Statin

13

## Background

The increasing prevalence of type 2 diabetes mellitus (T2DM) is a significant global healthcare concern<sup>1</sup>. According to the UK Prospective Diabetes Study (UKPDS)<sup>10</sup>, nearly half of the deaths that occur within a decade of being diagnosed with DM are attributable to cardiovascular disease (CVD)<sup>2</sup>. Overall mortality due to vascular complications of DM increased by more than 30% between 2000 and 2016<sup>3</sup>.

Statins play a large role in the reduction of the low-density lipoprotein (LDL) cholesterol level, a main objective in the management of increased CVD risk<sup>3</sup>. A meta-analysis revealed that the occurrence of major vascular events among diabetic patients taking statins declined significantly (by 21%) with every 1 mmol/L decrease in the LDL cholesterol level, but that about 14% of these patients experienced cardiovascular events during a 5-year period<sup>5</sup>. According to the Multi-Ethnic Study of Atherosclerosis<sup>6</sup>, this residual atherosclerotic cardiovascular disease (ASCVD) risk in adults under statin treatment without prior ASCVD was associated with older age, male sex, previous or current smoking, higher systolic blood pressure (SBP), antihypertensive medication use, DM, and lower high-density lipoprotein (HDL) cholesterol levels. However, the residual risk has not been investigated thoroughly in patients with T2DM and no prior ASCVD. Thus, this study was conducted to identify parameters associated with the residual ASCVD risk in patients with T2DM and no prior ASCVD on statin therapy.

## Methods

### Data Sources and Subjects

This cross-sectional study was performed with data from the prospective Taiwan Diabetes Registry Study (TDRS) of the Diabetes Association of the Republic of China (Taiwan)<sup>7</sup>. Data from patients with recently diagnosed (<6 months) T2DM, obtained by

interviews with certified diabetes educators at the time of TDRS enrollment. Ninety-five primary care clinics and hospitals participated in the TDRS, and enrollment began in October 2015. The study was approved by the institutional review board of Taipei Veterans General Hospital (2015-08-003AC) and Taiwan's Joint Institutional Review Board (14-S- 012) and conducted in accordance with the Declaration of Helsinki. Participants in all studies provided written informed consent.

## Study Variables

We extracted data on patients' age, sex, smoking status, DM duration, history of hepatitis B or C infection, body mass index (BMI), waist circumference, SBP and diastolic blood pressure (DBP), heart rate (HR), complications of DM [cerebrovascular events, coronary and peripheral artery disease, retinopathy, neuropathy, and chronic kidney disease (CKD)], history of comorbidities, blood and urine laboratory findings, and medication use. Cerebrovascular events encompassed hemorrhagic and ischemic stroke. Peripheral artery diseases were those presenting with intermittent claudication, foot ulceration, impalpable pulsation at the dorsalis pedis or posterior tibial artery, and/or amputation history. Retinopathies (proliferative and nonproliferative) were conditions diagnosed with maculopathy and/or unilateral blindness. Neuropathies were defined by abnormal monofilament or vibration test results. CKD was defined by estimated glomerular filtration rate (eGFR)  $< 60 \text{ mL/min/1.73 m}^2$  (determined using the Cockcroft-Gault equation) and proteinuria (at least trace results of a urine dipstick test or urine albumin:creatinine ratio  $\geq 30$ ). Medication use encompassed statins, antihypertensives [e.g., angiotensin receptor blockers (ARBs), angiotensin-converting enzyme inhibitors (ACEis), calcium channel blockers (CCBs), diuretics, and alpha blockers], insulin, and oral antidiabetic drugs (OADs).

## 80 Inclusion and Exclusion Criteria

81 Data on patients using statins were included in the analysis. To select a population to  
82 which the UKPDS risk engine could be applied, we excluded patients with non-T2DM, age  
83 <25 or >65 years at the time of diabetes diagnosis, and diabetes duration  $\geq 20$  years. We  
84 further excluded patients who controlled their diabetes solely with lifestyle modifications  
85 and did not use insulin or OADs; those with previous CVD (coronary and peripheral artery  
86 disease and stroke); and those with serious life-threatening illnesses such as heart failure,  
87 renal failure (hemodialysis, peritoneal dialysis, and kidney transplantation), malignancies  
88 (e.g., lung, liver, colorectal, breast, endometrial, cervical, stomach, pancreatic, urinary tract,  
89 prostate, thyroid, head and neck, and skin cancers), and arrhythmia. Due to the computation  
90 of missing cholesterol data, patients with missing HDL cholesterol and total or LDL  
91 cholesterol values and those with triglyceride (TG) levels > 500 mg/dL were excluded.

## 93 Group Allocation and Outcomes

94 The patients were allocated to OAD, insulin, and OAD plus insulin groups. The 10-year  
95 risks of nonfatal and fatal coronary heart disease (CHD) and stroke were calculated using the  
96 UKPDS risk engine (version 2.01; <https://www.dtu.ox.ac.uk/riskengine/>) and compared  
97 among groups. We also evaluated the ability of the study variables to predict these risks.

## 99 Statistical Analysis

100 Categorical variables are expressed as numbers and percentages and were analyzed  
101 using the chi-squared test. Continuous variables are expressed as means  $\pm$  standard  
102 deviations and were examined using analysis of variance, followed by Sheffe's multiple  
103 comparison post hoc test. In risk calculation using the UKPDS risk engine, 95% confidence  
104 intervals were calculated and missing fasting glucose, creatinine, and eGFR data were

105 imputed using multiple imputation by chained equations with the R studio cloud<sup>8</sup>. Missing  
106 cholesterol data were computed using the equation total cholesterol = TG/5 + HDL  
107 cholesterol + LDL cholesterol. Patients with computed HDL cholesterol values < 0 mg/dL and  
108 those with risk values exhibiting error due to small HDL cholesterol values were excluded  
109 from further analysis.

110 To evaluate the ability of physical and biochemical variables to predict the 10-year risks  
111 of nonfatal and fatal CHD and stroke, we first constructed univariate linear regression  
112 models. Serum TG and alanine transaminase (ALT) values were also analyzed as natural  
113 logarithms (logTG and logALT). Variables with <sup>2</sup>  $P$  values < 0.05 in the univariate analysis and  
114 those with the smallest  $P$  values between TG/logTG, ALT/logALT, and serum creatinine/eGFR  
115 were entered into multivariate regression models. The <sup>9</sup> statistical analyses were conducted  
116 with SPSS software (version 23.0 for Windows; IBM Corporation, Armonk, NY, USA) and a <sup>12</sup>  
117 significance level of  $P < 0.05$ .

118

## 119 Results

### 120 Patient Characteristics

121 Of 1147 diabetic patients using statins identified, data from 683 were included in the  
122 final analysis (Figure 1). The OAD, insulin, and OAD plus insulin groups contained 576, 30,  
123 and 77 patients, respectively.

124 The patients' characteristics are presented in Table 1. Subjects using OAD alone ( $50.7 \pm$   
125  $9.2$  years old) are older in diabetes onset compared to those under therapy of both OAD and  
126 insulin ( $48.0 \pm 9.4$  years old) ( $p=0.021$ ). Subjects using OADs and insulin ( $5.6 \pm 7.2$  years) had  
127 longer DM durations than did those using insulin alone ( $2.5 \pm 5.3$  years) ( $p=0.038$ ) or OADs  
128 alone ( $2.3 \pm 4.8$  years) ( $p<0.001$ ). The glycated hemoglobin (HbA1c) concentration was  
129 higher in the insulin alone group ( $9.6 \pm 2.8$ ) ( $p=0.004$ ) and insulin-OAD combination group

130 (9.1 ± 2.5) (p=0.002) compared to the OADs alone group (8.1 ± 2.2). Subjects using both  
131 OADs and insulin (16/77, 20.8%) were more likely to develop CKD than were those using  
132 OADs alone (58/576, 10.1%) (p=0.011).

133 The 10-year risks of nonfatal CHD in OAD, insulin and OAD plus insulin groups were  
134 11.8%, 16.0%, and 16.8%, respectively. The 10-year risks of fatal CHD in OAD, insulin and  
135 OAD plus insulin groups were 6.4%, 9.6%, and 10.9%, respectively. The 10-year risks of  
136 nonfatal stroke in OAD, insulin and OAD plus insulin groups were 3.0%, 3.4%, and 4.3%,  
137 respectively. The 10-year risks of fatal stroke in OAD, insulin and OAD plus insulin groups  
138 were 0.3%, 0.4%, and 0.4%, respectively. Patients who used both insulin and OAD (16.8%,  
139 95% CI 12.5~21.1%) had higher 10-year risk of nonfatal (p=0.025) CHD, compared to those  
140 under OAD monotherapy (11.8%, 95% CI 10.6~13.0%). Similarly, patients who used both  
141 insulin and OAD (10.9%, 95% CI 7.5~14.3%) had higher 10-year risk of fatal (p=0.002) CHD,  
142 compared to those under OAD monotherapy (6.4%, 95% CI 5.6~7.1%). On the contrary,  
143 <sup>1</sup> there was no significant difference in 10-year risk of nonfatal and fatal CHD between those  
144 under insulin alone and OAD alone, or between insulin alone and combination therapy.  
145 Patients who used both insulin and OAD (4.3%, <sup>1</sup> 95% CI 3.2~5.5%) had higher 10-year risk of  
146 nonfatal stroke (p=0.043), compared to those under OAD monotherapy (3.0%, 95% CI  
147 <sup>16</sup> 2.7~3.4%). Nevertheless, there were no significant difference between either two groups in  
148 the 10-year risk of fatal stroke. (Figure 2).

149

#### 150 **Factors Associated with the Nonfatal and Fatal CHD Risks**

151 Table 2 showed clinical and laboratory factors and their standardized coefficients (β)  
152 that predict the 10-year risks of nonfatal and fatal CHD and stroke.

153 In the univariate model, patients having diabetic complications including neuropathy  
154 and CKD, those with higher logTG, LDL cholesterol, fasting glucose, and those under



155 medications such as CCB and insulin were associated with significantly greater risks of  
156 nonfatal CHD (Table 2). Similarly, greater risks of fatal CHD were associated with neuropathy  
157 and CKD; higher logTG, LDL cholesterol, fasting glucose, and the use of CCB and insulin.  
158 Lower BMI and lower logALT were associated with a greater nonfatal CHD risk. Similarly,  
159 greater risks of fatal CHD were associated with lower BMI and lower logALT (Table 2).

160 In the multivariate model, lower BMI and lower logALT level; higher logTG, LDL  
161 cholesterol, fasting glucose, CCB and insulin use were associated independently with a  
162 greater nonfatal CHD risk (Table 2). Similarly, in the multivariate model, greater risk of fatal  
163 CHD was independently associated with lower BMI and lower logALT level; higher logTG, LDL  
164 cholesterol, fasting glucose, CCB and insulin use.

165

#### 166 **Factors Associated with Nonfatal and Fatal Stroke Risks**

167 In the univariate model, diabetic patients complicated with CKD and neuropathy, having  
168 lower DBP, BMI, LDL cholesterol, and logALT, and using medications including ARB, CCB,  
169 diuretics were at an elevated nonfatal 10-year stroke risk. Among the above-mentioned  
170 factors, lower DBP, BMI, and LDL cholesterol, and the use of CCB remained significant in the  
171 multivariate analysis.

172 In the univariate model, an increased residual risk of fatal stroke was associated with  
173 diabetic complications including retinopathy, neuropathy, CKD. In addition, patients with  
174 lower BMI, LDL cholesterol, and logALT and those using ARB, CCB, and diuretics were  
175 associated with higher risks of fatal stroke. In the multivariate regression model,  
176 independent risk factors of fatal stroke included lower BMI, logALT, and the use of CCB.

177

#### 178 **Discussion**

179 In this study, we identified factors affecting the residual risks of CHD and stroke in patients

180 with diabetes under statin treatment. In addition to CKD, neuropathy, and insulin and CCB  
181 use, we determined that higher LDL, fasting glucose, and logTG levels were associated with  
182 an increased CHD risk. We advance knowledge in this area by further showing that higher  
183 BMI and logALT values <sup>19</sup> were associated with a reduced risk of CHD in this population. The  
184 residual risk of stroke was associated with CKD, neuropathy, CCB use, and low LDL  
185 cholesterol levels, lower BMI and lower DBP in this study. The reduction of both residual  
186 risks of CHD and stroke with higher BMI suggests that the obesity paradox can be applied to  
187 patients with T2DM on statin therapy.

188 Obesity is known to increase the CVD risk in the general population<sup>9</sup>, but to prolong  
189 survival in patients with CVD<sup>10</sup>. The obesity paradox has also been reported to apply to  
190 patients with T2DM, possibly because genetically susceptible individuals develop T2DM at  
191 lower BMIs and have elevated risks of other diseases and complications, and thus poor  
192 prognoses<sup>11,12</sup>. Another explanation is that confounding factors have not been addressed  
193 properly in previous research, potentially leading to the underestimation of the effect of the  
194 BMI on the mortality risk<sup>13</sup>. The underlying mechanism of obesity paradox in this study  
195 needs further research to be clarified.

196 Interestingly, the role of LDL cholesterol in residual risks of CHD showed different from  
197 in that of stroke in this study. There is expansion of evidence in “lower is better” principle of  
198 LDL cholesterol management for prevention of CHD<sup>14,15</sup>. In concordance with the previous  
199 findings, we found that lower LDL cholesterol levels were <sup>3</sup> associated with the reduced risk of  
200 CHD among populations receiving statin therapy. Furthermore, previous reports  
201 demonstrated that lipid-lowering therapy reduced risks of ischemic stroke but increased  
202 risks of hemorrhagic stroke<sup>16</sup>. In this study, lower LDL cholesterol levels associated with  
203 higher risk of stroke. One possible explanation might be increased risks of hemorrhagic  
204 stroke. The adequate LDL cholesterol target in patients with T2DM on statin therapy would

205 need individual consideration of prevention CHD or stroke.

206 We demonstrated that higher LDL cholesterol and lower logALT levels were residual risk  
207 factors of CHD. Consistently, in the Treating to New Targets study, higher atorvastatin  
208 dosages were associated with lower LDL cholesterol levels, higher ALT levels, and fewer first  
209 major cardiovascular events in patients with diabetes<sup>17</sup>. <sup>21</sup> The Pravastatin or Atorvastatin  
210 Evaluation and Infection Therapy trial also demonstrated that the statin dose was related  
211 positively to the incidence of transaminitis<sup>18</sup>. The possible explanation is that higher ALT  
212 levels associated with higher statin dose and lower CHD complications.

213 Insulin use was a residual risk factor of CHD but not stroke in this study. The  
214 cardiovascular outcomes of insulin therapy remain controversial. Findings from the large  
215 Action to Control Cardiovascular Risk in Diabetes<sup>19</sup> and Outcome Reduction with Initial  
216 Glargine Intervention<sup>20</sup> randomized controlled trials suggest that insulin has a neutral effect  
217 on cardiovascular diseases, whereas some observational studies<sup>21,22</sup> have revealed that it  
218 substantially increases cardiovascular risks. This discrepancy can be explained in part by  
219 confounding by factors such as diabetes severity and renal impairment<sup>23</sup>. However, our  
220 multivariate analyses were adjusted for these factors. Another possible explanation is that  
221 insulin users in our population were younger at diabetes onset and had higher HbA1c  
222 concentrations (independent risk factors for adverse cardiovascular events<sup>24</sup>) relative to non-  
223 users.

224 In our adjusted analyses, higher DBP was associated with better stroke outcomes. This  
225 finding suggests that the CVD risk increases with the pulse pressure, consistent with the  
226 demonstration in a meta-analysis that CVD-related mortality increases by nearly 20% with a  
227 10-mm Hg increase in the pulse pressure<sup>25</sup>. The increased CVD risk with low DBP has been  
228 attributed to decreased perfusion to vital organs and the parallel increase in SBP with age-  
229 related arterial stiffening<sup>26</sup>.

230 Our result suggested that logTG was a residual risk factor for CHD. This finding is  
231 supported by a previous retrospective study showing a strong association between TG levels  
232 greater than 150 mg/dL and initial major adverse cardiovascular events among statin-  
233 treated diabetic patients with LDL cholesterol levels < 100 mg/dL<sup>27</sup>. Hypertriglyceridemia-  
234 related subclinical atherosclerosis and vascular inflammation may contribute to  
235 atherosclerotic plaque development and subsequent cardiovascular events independently of  
236 the LDL cholesterol concentration<sup>27,28</sup>. These findings suggest that the reduction of the TG  
237 level is a potential target for the reduction of the residual risks of CHD events in diabetic  
238 patients with LDL concentrations falling within guideline recommendations.

239 In agreement with previous findings, this study showed that CKD is <sup>1</sup> a risk factor for poor  
240 cardiovascular outcomes in patients with diabetes under statin treatment. An analysis of  
241 <sup>5</sup> data from the Third National Health and Nutrition Examination Survey showed that CKD was  
242 associated independently with an increased cardiovascular mortality risk among patients  
243 with diabetes<sup>29</sup>. Statins were found to protect against cardiovascular complications in  
244 patients with diabetes and CKD in one study<sup>30</sup>, but to have reduced efficacy with  
245 deteriorating renal function in a meta-analysis<sup>31</sup>. These findings may be explained by the  
246 occurrence of vascular calcification in advanced CKD<sup>32</sup>.

247 Peripheral neuropathy was a residual risk factor for CHD and stroke in this study. In  
248 diabetic patients, neuropathy shares risk factors with cardiovascular complications<sup>33</sup>.  
249 Peripheral neuropathy independently predicts initial CVD in patients with T2DM<sup>34</sup>. The  
250 association of peripheral neuropathy with cardiovascular events likely reflects the  
251 involvement of common pathways, including systemic inflammation<sup>35</sup> and lipid  
252 dysmetabolism<sup>36</sup>, which may be reversed by statin therapy<sup>37</sup>. The cross-sectional and  
253 longitudinal Fremantle Diabetes Study showed that statins prevented diabetic neuropathy<sup>38</sup>,  
254 potentially due to their lipid-lowering, endothelial cell-activating, and anti-inflammatory

255 effects. However, other pathogenetic mechanisms, such as the chronic hyperglycemia-  
256 facilitated deposition of advanced glycation end products in nerves<sup>39</sup> and vessels<sup>40</sup>, which  
257 leads to diabetic neuropathy and cardiovascular events, are not related clearly to statin use.

258 Current American Diabetes Association guidelines recommend an ACEi or ARB as the  
259 first-line medication for diabetes, especially in patients with proteinuria, and the addition of  
260 CCB as a second-line medication<sup>41</sup>. The observed association of CCB use with increased CHD  
261 and stroke risks<sup>42</sup> could be explained by polypharmacy-related poor cardiovascular drug  
262 compliance and the subsequent increased risk of adverse outcomes<sup>43</sup>.

263 <sup>11</sup> This study has several limitations. Its cross-sectional design prevented the  
264 establishment of causal relationships; prospective <sup>20</sup> longitudinal studies are needed to  
265 investigate the causal relationships between residual risk factors and cardiovascular  
266 outcomes. In addition, the types, dosages, and use durations of statins and anti-diabetic  
267 medications were not included in the study data and thus were not examined. Variation in  
268 the underlying mechanisms, potency, and side effects of medications in the same class may  
269 influence patient adherence, laboratory findings, and the endpoints examined in this study.  
270 Furthermore, this study used BMI to infer “obesity paradox”. However, BMI is not  
271 synonymous with excess adiposity, measured by body fat percentage. Further research  
272 may include measurements of body composition and their distribution for elucidation of  
273 obesity paradox. Additionally, data from the present study were insufficient to differentiate  
274 between ischemic and hemorrhagic strokes in the analysis.

## 275 **Conclusions**

276 Based on the findings of this study, insulin may possibly increase risk of of CHD but not  
277 stroke in statin-treated patients with T2DM. We suggest the use of higher statin doses to  
278 lower LDL cholesterol levels, even with ALT elevation, to further reduce CHD risks in patients  
279 with T2DM. On the other hand, lower LDL cholesterol level and lower DBP related to higher

280 risk of stroke among populations receiving statin therapy. Therefore, in patients with T2DM  
281 on statin therapy, a higher LDL cholesterol target may possibly be acceptable in those with  
282 lower DBP. Under statin therapy and with the control of other known risk factors, residual  
283 cardiovascular risks may be lower in obese than in non-obese subjects with T2DM. CKD,  
284 neuropathy, and higher TG levels were also residual risk factors in this study, as was the use  
285 of CCBs, possibly representing poly-antihypertensive agent use.

286 **Figure legends**

287 Figure 1. Flowchart of study subject selection process

288

289 Figure 2. Residual risk of nonfatal, fatal coronary heart disease and stroke in oral antidiabetic  
290 drug (OAD) monotherapy group, insulin monotherapy group, and OAD+Insulin dual therapy  
291 group

# Residual Risk of Cardiovascular Complications in Statin-Using Patients with Type 2 Diabetes: The Taiwan Diabetes Registry Study

ORIGINALITY REPORT

9%

SIMILARITY INDEX

## PRIMARY SOURCES

|   |                                                                                                                                                                                                                                                                       |                 |
|---|-----------------------------------------------------------------------------------------------------------------------------------------------------------------------------------------------------------------------------------------------------------------------|-----------------|
| 1 | <a href="http://www.science.gov">www.science.gov</a><br>Internet                                                                                                                                                                                                      | 39 words — 1%   |
| 2 | <a href="http://link.springer.com">link.springer.com</a><br>Internet                                                                                                                                                                                                  | 37 words — 1%   |
| 3 | "Handbook of nutrition in heart health", Brill, 2017<br>Crossref                                                                                                                                                                                                      | 26 words — 1%   |
| 4 | <a href="http://ecommons.aku.edu">ecommons.aku.edu</a><br>Internet                                                                                                                                                                                                    | 25 words — 1%   |
| 5 | <a href="http://bmjopen.bmj.com">bmjopen.bmj.com</a><br>Internet                                                                                                                                                                                                      | 16 words — < 1% |
| 6 | Eberhard Wille, Jürgen Scholze, Eduardo Alegria, Claudio Ferri et al. "Modelling the costs of care of hypertension in patients with metabolic syndrome and its consequences, in Germany, Spain and Italy", The European Journal of Health Economics, 2010<br>Crossref | 15 words — < 1% |
| 7 | <a href="http://bmcpsychiatry.biomedcentral.com">bmcpsychiatry.biomedcentral.com</a><br>Internet                                                                                                                                                                      | 15 words — < 1% |



8

Internet

15 words — &lt; 1%

9

[www.spandidos-publications.com](http://www.spandidos-publications.com)

Internet

15 words — &lt; 1%

10

Xue Sun, Jie He, Xiao-Li Ji, Yi-Ming Zhao et al.  
"Association of Chronic Kidney Disease with  
Coronary Heart Disease and Stroke Risks in Patients with Type  
2 Diabetes Mellitus", Chinese Medical Journal, 2017

Crossref

14 words — &lt; 1%

11

[pubs.sciepub.com](http://pubs.sciepub.com)

Internet

14 words — &lt; 1%

12

[pure.rug.nl](http://pure.rug.nl)

Internet

12 words — &lt; 1%

13

[globalizationandhealth.biomedcentral.com](http://globalizationandhealth.biomedcentral.com)

Internet

11 words — &lt; 1%

14

[ir.ymlib.yonsei.ac.kr](http://ir.ymlib.yonsei.ac.kr)

Internet

11 words — &lt; 1%

15

Masson, Patricia R.. "Factors Influencing Blood  
Pressure Control Among Hypertensive Adults 35 to  
64 Years of Age at Risk for Stroke", University of Massachusetts  
Lowell, 2023

ProQuest

9 words — &lt; 1%

16

[arrhythmia.biomedcentral.com](http://arrhythmia.biomedcentral.com)

Internet

9 words — &lt; 1%

17

[ndltd.ncl.edu.tw](http://ndltd.ncl.edu.tw)

Internet

9 words — &lt; 1%

18

[www.frontiersin.org](http://www.frontiersin.org)

Internet

9 words — < 1%

19 [www.researchgate.net](http://www.researchgate.net)  
Internet

9 words — < 1%

20 [www.researchsquare.com](http://www.researchsquare.com)  
Internet

9 words — < 1%

21 R. R. Holman. "Atorvastatin in Factorial with Omega-3 EE90 Risk Reduction in Diabetes (AFORRD): a randomised controlled trial", Diabetologia, 01/2009  
Crossref

8 words — < 1%

22 Bianchi, C.. "Non-traditional markers of atherosclerosis potentiate the risk of coronary heart disease in patients with type 2 diabetes and metabolic syndrome", Nutrition, Metabolism and Cardiovascular Diseases, 200801  
Crossref

7 words — < 1%

23 Roberto B. Vargas, Carol M. Mangione, Steven Asch, Joan Keeseey, Mayde Rosen, Matthias Schonlau, Emmett B. Keeler. "Can a Chronic Care Model Collaborative Reduce Heart Disease Risk in Patients with Diabetes?", Journal of General Internal Medicine, 2007  
Crossref

6 words — < 1%

EXCLUDE QUOTES OFF  
EXCLUDE BIBLIOGRAPHY OFF

EXCLUDE SOURCES OFF  
EXCLUDE MATCHES OFF
